# Supplementary material
Source: PubMed Central journal article supplement (PMC4799748)
Supplement: NIHMS756307-supplement-1.pdf [file NIHMS756307-supplement-1.pdf]

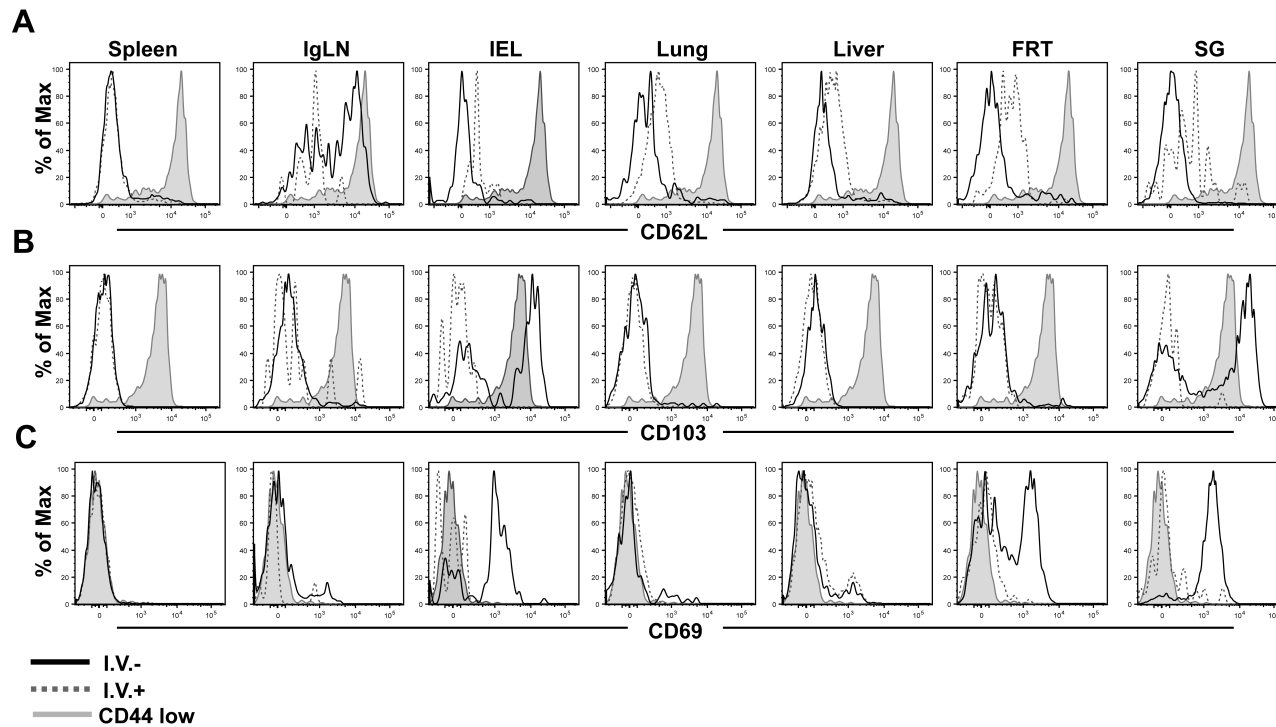

**SUPPLEMENTAL FIGURE 1. Ag-specific short-boosted CD8 T cells in certain non-lymphoid tissues display a resident memory phenotype.**

(A-C) Phenotyping of splenic, inguinal lymph node (IgLN), peripheral blood lymphocyte (PBL), small intestinal intraepithelial lymphocyte (IEL), lung, liver, female reproductive tract (FRT) and salivary gland (SG) cells isolated at least 95 days after 3<sup>rd</sup> infection. Histograms are gated on CD44<sup>+</sup> K<sup>b</sup>-SIINFEKL-specific CD8 T cells in the tissue parenchyma (I.V.-, black, solid line) and tissue vasculature (I.V.+, dark grey, dotted line). CD44 low CD8 T cells from spleen (solid, light grey, filled) are shown as a non-antigen experienced control. Data are representative of 2 experiments, at least N=3 mice per experiment, except IEL and SG where is N=3 total. CD62L data are representative of 1 experiment of at least N=3.
